# Supplementary material for: ENSO Teleconnections and Seasonal Forecasts of Wet Season Droughts in the Arabian Peninsula
Source: Research Square preprint supplement (doi:10.21203/rs.3.rs-8307914/v1), 2025-12-17
Supplement: Supplementary file 1 [file 0a993f174643096a6352b1ef.docx]

**Supplementary material**

**ENSO Teleconnections and Seasonal Forecasts of Wet Season Droughts in the Arabian Peninsula**

**Authors:** Muhammad Azhar Ehsan1,2,3, Emile Esmaili1,6, Andrew W. Robertson1,2,3, Md Saquib Saharwardi4,5, Jing Yuan1,2,3, Matteo Zampieri4,5, Thang Luong4,5, Ibrahim Hoteit4

1Center for Climate Systems Research, Columbia Climate School, Columbia University, New York, NY 10968, USA.

2NASA Goddard Institute for Space Studies, New York, NY, USA.

3International Research Institute for Climate and Society, Columbia Climate School, Columbia University, New York, NY 10968, USA.

4King Abdullah University of Science and Technology, Thuwal, Jeddah, Saudi Arabia.

5Climate Change Center, National Center for Meteorology, Jeddah, Saudi Arabia.

6Center for Policy Research on Energy and The Environment, Princeton University, NJ, USA

Dec, 2025

Initial Submission to

npj Natural Hazards

______________________________________________________________________________

*To whom correspondence should be addressed: **Muhammad Azhar Ehsan,** Center for Climate Systems Research, Columbia Climate School, Columbia University, New York, NY 10968, USA. Email: [mae2171@columbia.edu](http://azhar@iri.columbia.edu)

**ABSTRACT**

Containing supplementary figures for main manuscript.

1. **Supplementary Figures**

|  |
| --- |

**Figure S1:** Elevation map of the Arabian Peninsula and surrounding regions, with elevation in meters from 0 (blue) to over 3000 m (brown). Higher terrain appears in western Arabia, southwestern Iran, and northern mountain ranges.

|  |
| --- |

**Figure S2:** Seasonal distribution of rainfall over the Arabian Peninsula and surrounding regions, shown as the percentage of annual rainfall during each overlapping 3-month period: (a) OND, (b) NDJ, (c) DJF, (d) JFM, (e) FMA, and (f) MAM. Colors indicate the fraction of annual rainfall received in each period, from 0% (cream) to 100% (green). Note that seasons overlap (e.g., December appears in OND, NDJ, and DJF), so panels are not independent, and values should not be summed across panels.

|  |
| --- |

**Figure S3:** Seasonal distribution of the Standardized Precipitation Index (SPI) over three different 20-year periods: 1981–2000 (blue), 2001–2020 (orange), and the full period 1981–2020 (green). Each panel represents a different season: (a) OND, (b) NDJ, (c) DJF, (d) JFM, (e) FMA, and (f) MAM. The density plots show a shift toward more negative SPI values in the 2001–2020 period compared to 1981–2000, indicating an increased tendency toward drier conditions in recent decades. The vertical dashed line at SPI = 0 represents climatological normal conditions.

|  |  |
| --- | --- |
|  |  |
|  |  |

**Figure S4:** Box-whisker plots of spatial correlation values between MME forecasts and observations over the AP region, shown for different seasons (OND, NDJ, DJF, JFM, FMA, MAM) and lead times. Each box represents the distribution of correlation values across grid points within the AP domain, capturing spatial variability in forecast skill. Lead times (in months) indicate the blend of observations and forecasts: 0.5 (2 obs, 1 forecast), 1.5 (1 obs, 2 forecasts), and 2.5 onward (fully forecast-based), while persistence shows a gradually increasing persistence.

|  |
| --- |

**Figure S5:** Box-whisker plots of spatial correlation values over the AP region, shown for different seasons (OND, NDJ, DJF, JFM, FMA, MAM) in individual models as well as their multi-model ensemble (MME). Forecasts are initialized at the beginning of each respective season. Each box represents the distribution of correlation values across grid points within the AP domain, capturing spatial variability in forecast skill.

|  |  |
| --- | --- |

|  |  |
| --- | --- |
|  |  |

**Figure S6:** Reliability diagrams for the “above normal” SPI category over the Arabian Peninsula, based on Multi-Model Ensemble (MME) forecasts from the North American Multi-Model Ensemble (NMME). Panels represent six overlapping 3-month seasons: (a) OND, (b) NDJ, (c) DJF, (d) JFM, (e) FMA, and (f) MAM. Each diagram plots observed frequency (orange line) against forecast probability, with the dashed diagonal indicating perfect reliability. Blue bars depict the normalized distribution of forecast probabilities, while shaded regions denote the “No Skill” and “No Resolution” zones. Skill metrics are provided for each season: Brier Skill Score (BSS), where higher values indicate better performance relative to climatology; Reliability (REL), where lower values indicate better reliability; and Resolution (RES), where higher values reflect stronger discriminatory ability. Collectively, lower REL, higher BSS, and higher RES values indicate a more skillful and reliable probabilistic forecast.

|  |  |
| --- | --- |
|  |  |
|  |  |

**Figure S7:** Reliability diagrams for the “near normal” SPI category over the Arabian Peninsula, based on Multi-Model Ensemble (MME) forecasts from the North American Multi-Model Ensemble (NMME). Panels represent six overlapping 3-month seasons: (a) OND, (b) NDJ, (c) DJF, (d) JFM, (e) FMA, and (f) MAM. Each diagram plots observed frequency (orange line) against forecast probability, with the dashed diagonal indicating perfect reliability. Blue bars depict the normalized distribution of forecast probabilities, while shaded regions denote the “No Skill” and “No Resolution” zones. Skill metrics are provided for each season: Brier Skill Score (BSS), where higher values indicate better performance relative to climatology; Reliability (REL), where lower values indicate better reliability; and Resolution (RES), where higher values reflect stronger discriminatory ability. Collectively, lower REL, higher BSS, and higher RES values indicate a more skillful and reliable probabilistic forecast.

|  |
| --- |

**Figure S8:** Box-whisker plots of spatial ranked probability skill score values over the AP region, shown for different seasons (OND, NDJ, DJF, JFM, FMA, MAM) in individual models as well as their multi-model ensemble (MME). Forecasts are initialized at the beginning of each respective season. Each box represents the distribution of correlation values across grid points within the AP domain, capturing spatial variability in forecast skill.

|  |  |
| --- | --- |
|  |  |
|  |  |

**Figure S9:** Seasonal forecasts and corresponding observations of the Standardized Precipitation Index over AP for the 2024–2025 extended winter season. Each panel pair shows the SPI forecast from the North American Multi-Model Ensemble (NMME) Multi-Model Ensemble (MME) (left) and the corresponding observed SPI (right) for six overlapping 3-month target seasons: (a) OND, (b) NDJ, (c) DJF, (d) JFM, (e) FMA, and (f) MAM. Forecasts are initialized at the beginning of each respective season. Brown shading indicates drier-than-normal conditions, while green/blue shading indicates wetter-than-normal conditions. Pink shading in the maps shows regions where a dry mask was applied and were not considered part of the analysis.

|  |
| --- |

**Figure S10:** Areas (grid points) where precipitation was less than 1mm/month during more than 10% of the 1991–2020 climatological base period is masked and excluded from SPI calculation. These areas represent regions with extremely sparse seasonal rainfall within the analysis domain.
